# Supplementary material
Source: PubMed Central journal article supplement (PMC6889718)
Supplement: 10.1194_M093971_jlr.M093971-1.pdf [file 10.1194_M093971_jlr.M093971-1.pdf]

Maekawa M. *et al.*, Supplemental Fig. 1

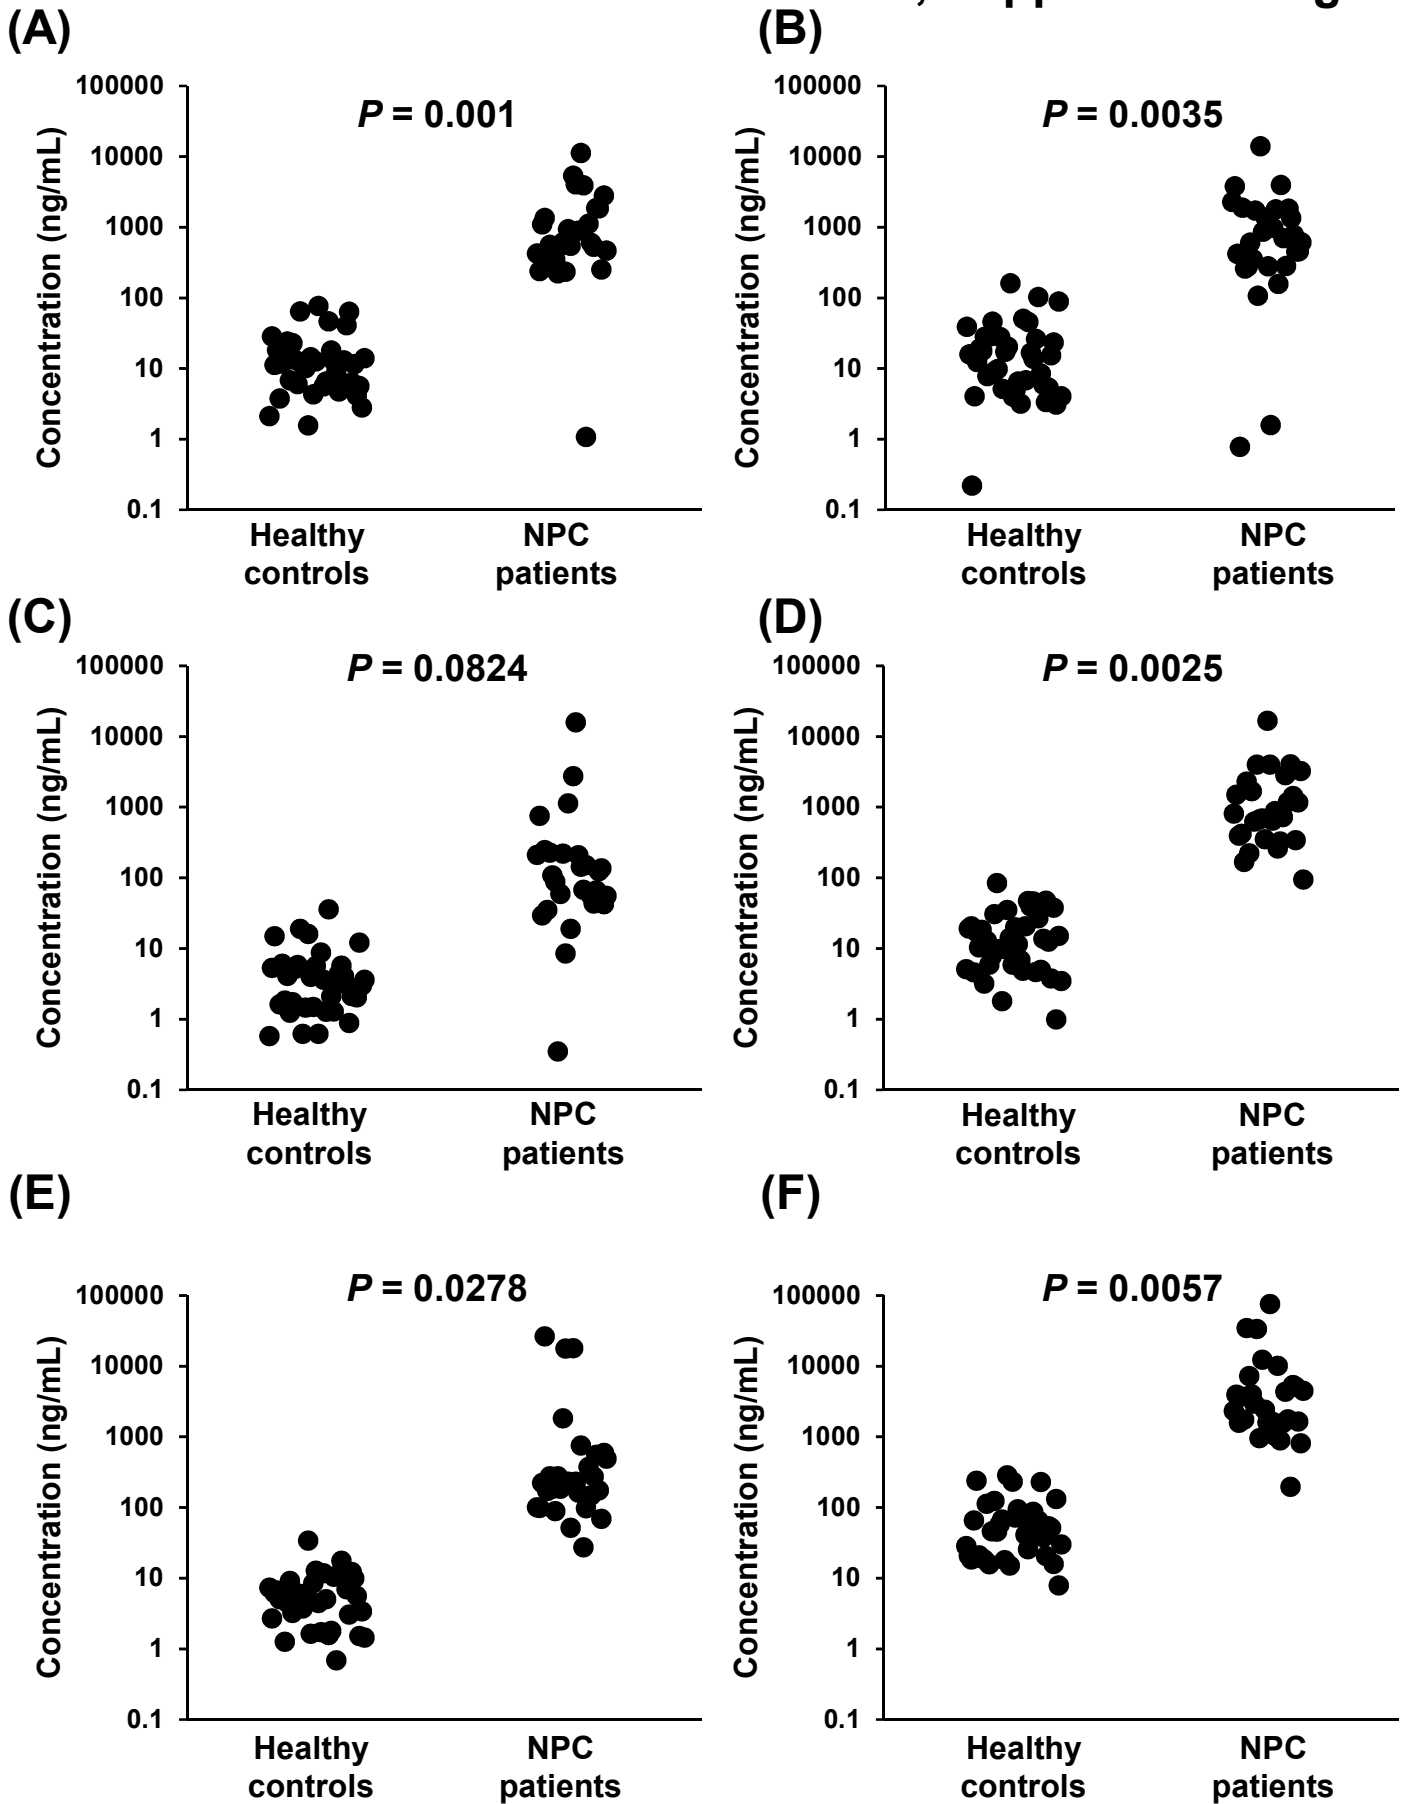

Uncorrected-concentrations of SNAG- $\Delta^5$ -CA (A), SNAG- $\Delta^5$ -CG (B), SNAG- $\Delta^5$ -CT (C), S7B- $\Delta^5$ -CA (D), S7O- $\Delta^5$ -CA (E), and the total concentration (F) in the urine of healthy controls and NPC patients. The metabolites other than SNAG- $\Delta^5$ -CT in the urine of NPC patients were significantly higher than those in healthy controls.
