# Supplementary material
Source: PubMed Central journal article supplement (PMC6889718)
Supplement: 10.1194_M093971_jlr.M093971-2.pdf [file 10.1194_M093971_jlr.M093971-2.pdf]

# Maekawa M. et al., Supplemental Fig. 2

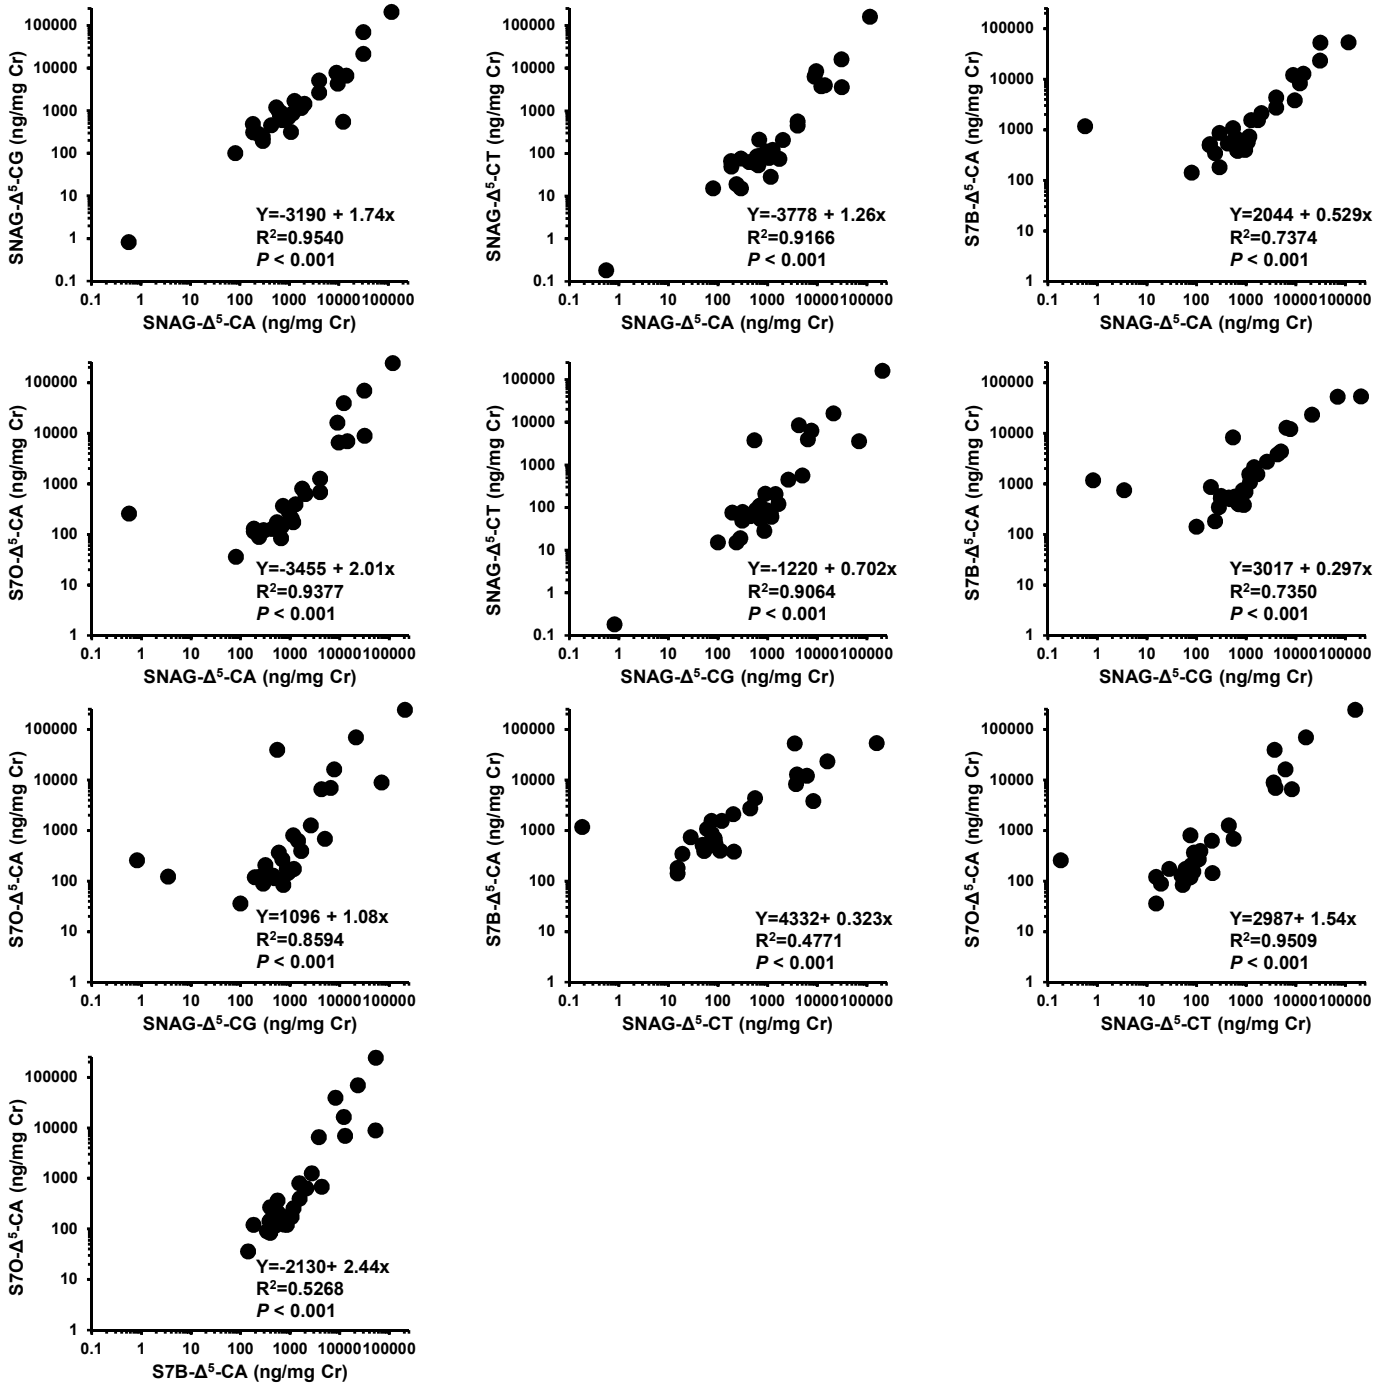

Correlation of the urinary concentrations of each metabolite. Correlations were found in all combinations.
