# Supplementary material
Source: PubMed Central journal article supplement (PMC6889718)
Supplement: 10.1194_M093971_jlr.M093971-3.pdf [file 10.1194_M093971_jlr.M093971-3.pdf]

Supplementary Table 1 MS/MS parameters in selected reaction monitoring.

| No | Compound             | Q1<br>( <i>m/z</i> ) | Q3<br>( <i>m/z</i> ) | DP<br>(V) | EP<br>(V) | CE<br>(V) | CXP<br>(V) |
|----|----------------------|----------------------|----------------------|-----------|-----------|-----------|------------|
| 1  | SNAG- $\Delta^5$ -CA | 672.3                | 97.0                 | -70       | -8        | -70       | -14        |
| 2  | SNAG- $\Delta^5$ -CG | 364.2                | 97.0                 | -30       | -10       | -42       | -14        |
| 3  | SNAG- $\Delta^5$ -CT | 389.2                | 97.0                 | -100      | -14       | -42       | -14        |
| 4  | S7B- $\Delta^5$ -CA  | 469.2                | 97.0                 | -320      | -12       | -80       | -14        |
| 5  | S7O- $\Delta^5$ -CA  | 467.1                | 97.0                 | -240      | -12       | -60       | -14        |
| 6  | IS                   | 455.3                | 97.0                 | -80       | -12       | -75       | -10        |

CE, Collision energy; CXP, Collision cell exit potential; DP, Declustering potential; EP, Entrance potential; SNAG- $\Delta^5$ -CA,

3 $\beta$ -Sulfooxy-7 $\beta$ -*N*-acetylglucosaminyl-5-cholenoic acid; SNAG- $\Delta^5$ -CG, Glycine-amidated

3 $\beta$ -sulfooxy-7 $\beta$ -*N*-acetylglucosaminyl-5-cholenoic acid; SNAG- $\Delta^5$ -CT, Taurine-amidated

3 $\beta$ -sulfooxy-7 $\beta$ -*N*-acetylglucosaminyl-5-cholenoic acid; S7B- $\Delta^5$ -CA, IS, internal standard, 3 $\beta$ -Sulfooxy-7 $\beta$ -hydroxy-23-*nor*-5-cholenoic acid; 3 $\beta$ -Sulfooxy-7 $\beta$ -hydroxy-5-cholenoic acid; S7O- $\Delta^5$ -CA, 3 $\beta$ -Sulfooxy-7-oxo-5-cholenoic acid; IS, internal standard.
