# Supplementary material
Source: PubMed Central journal article supplement (PMC6889718)
Supplement: 10.1194_M093971_jlr.M093971-4.pdf [file 10.1194_M093971_jlr.M093971-4.pdf]

Supplementary Table 2 Procedure of sample preparations for matrix effects, calibration curves, QC samples and urine samples.

(A) Sample set for investigation of matrix effects

|                                                              |                                 | (1) Neat standard                                                                                               | (2) Urine                | (3) Standard spiked urine                     |
|--------------------------------------------------------------|---------------------------------|-----------------------------------------------------------------------------------------------------------------|--------------------------|-----------------------------------------------|
| 100 $\mu$ L of Mixture containing sample matrix and analytes | 50 $\mu$ L of Matrix solution   | Surrogate matrix (Water)                                                                                        | Sample matrix (Urine)    | Sample matrix (Urine)                         |
|                                                              | 50 $\mu$ L of standard solution | 50 ng/mL Analytes in ethanol/water (1:1, v/v)                                                                   | Ethanol/water (1:1, v/v) | 50 ng/mL Analytes in ethanol/water (1:1, v/v) |
| 50 $\mu$ L of IS solution                                    |                                 | 33 ng/mL of 3 $\beta$ -sulfooxy-7 $\beta$ -hydroxy-23- <i>nor</i> -5-cholenoic acid in ethanol/water (1:1, v/v) |                          |                                               |
| 350 $\mu$ L of Dilution solution                             |                                 | Water                                                                                                           |                          |                                               |
| ↓ Centrifugation                                             |                                 |                                                                                                                 |                          |                                               |
| Analysis (200 $\mu$ L of sample aliquot)                     |                                 |                                                                                                                 |                          |                                               |

(B) Sample set for investigation of analytical method validation

|                                                              |                                 | (1) Calibration solutions                                                                                       | (2) Urine (N=6)                            | (3) Standard spiked urine (N=6)                       |
|--------------------------------------------------------------|---------------------------------|-----------------------------------------------------------------------------------------------------------------|--------------------------------------------|-------------------------------------------------------|
| 100 $\mu$ L of Mixture containing sample matrix and analytes | 50 $\mu$ L of Matrix solution   | Surrogate matrix (Water)                                                                                        | Sample matrix (Urine from healthy subject) | Sample matrix (Urine from healthy subject)            |
|                                                              | 50 $\mu$ L of standard solution | 0.3-1000 ng/mL Analytes in ethanol/water (1:1, v/v)                                                             | Ethanol/water (1:1, v/v)                   | 2, 50, 800 ng/mL Analytes in ethanol/water (1:1, v/v) |
| 50 $\mu$ L of IS solution                                    |                                 | 33 ng/mL of 3 $\beta$ -sulfooxy-7 $\beta$ -hydroxy-23- <i>nor</i> -5-cholenoic acid in ethanol/water (1:1, v/v) |                                            |                                                       |
| 350 $\mu$ L of Dilution solution                             |                                 | Water                                                                                                           |                                            |                                                       |
| ↓ Centrifugation                                             |                                 |                                                                                                                 |                                            |                                                       |
| Analysis (200 $\mu$ L of sample aliquot)                     |                                 |                                                                                                                 |                                            |                                                       |

(C) Sample set for analysis of sample urine

|                                                              |                                 |                                                                                                                 |                          |
|--------------------------------------------------------------|---------------------------------|-----------------------------------------------------------------------------------------------------------------|--------------------------|
|                                                              |                                 | (1) Calibration sample                                                                                          | (2) Sample urine         |
| 100 $\mu$ L of Mixture containing sample matrix and analytes | 50 $\mu$ L of Matrix solution   | Surrogate matrix (Water)                                                                                        | Sample matrix (Urine)    |
|                                                              | 50 $\mu$ L of standard solution | 0.3-1000 ng/mL analytes in ethanol/water (1:1, v/v)                                                             | Ethanol/water (1:1, v/v) |
| 50 $\mu$ L of IS solution                                    |                                 | 33 ng/mL of 3 $\beta$ -sulfooxy-7 $\beta$ -hydroxy-23- <i>nor</i> -5-cholenoic acid in ethanol/water (1:1, v/v) |                          |
| 350 $\mu$ L of Dilution solution                             |                                 | Water                                                                                                           |                          |
| ↓ Centrifugation                                             |                                 |                                                                                                                 |                          |
| Analysis (200 $\mu$ L of sample aliquot)                     |                                 |                                                                                                                 |                          |
