# Supplementary material
Source: PubMed Central journal article supplement (PMC6889718)
Supplement: 10.1194_M093971_jlr.M093971-5.pdf [file 10.1194_M093971_jlr.M093971-5.pdf]

Supplementary Table 3 Calibration curves of each analytes and matrix factor of analytes and IS.

(A) Standard calibration curves

| No | Compound             | Quantitation range<br>(ng/mL) | Regression equation    | Correlation coefficient |
|----|----------------------|-------------------------------|------------------------|-------------------------|
| 1  | SNAG- $\Delta^5$ -CA | 0.3–1000                      | $y=0.00725x+0.0000317$ | 0.998                   |
| 2  | SNAG- $\Delta^5$ -CG | 0.3–1000                      | $y=0.00751x+0.000778$  | 0.999                   |
| 3  | SNAG- $\Delta^5$ -CT | 0.3–1000                      | $y=0.0111x+0.000224$   | 1.000                   |
| 4  | S7B- $\Delta^5$ -CA  | 0.3–1000                      | $y=0.00397x+0.000246$  | 0.997                   |
| 5  | S7O- $\Delta^5$ -CA  | 0.3–1000                      | $y=0.00847x+0.000216$  | 0.998                   |

(B) Matrix factors

| No | Compound             | Matrix factor<br>(%) | IS normalized matrix factor<br>(%) |
|----|----------------------|----------------------|------------------------------------|
| 1  | SNAG- $\Delta^5$ -CA | 102                  | 101                                |
| 2  | SNAG- $\Delta^5$ -CG | 103                  | 102                                |
| 3  | SNAG- $\Delta^5$ -CT | 105                  | 104                                |
| 4  | S7B- $\Delta^5$ -CA  | 102                  | 101                                |
| 5  | S7O- $\Delta^5$ -CA  | 105                  | 104                                |
| 6  | IS                   | 101                  | -                                  |

N=3.

SNAG- $\Delta^5$ -CA, 3 $\beta$ -Sulfooxy-7 $\beta$ -*N*-acetylglucosaminyl-5-cholenoic acid; SNAG- $\Delta^5$ -CG, Glycine-amidated

3 $\beta$ -sulfooxy-7 $\beta$ -*N*-acetylglucosaminyl-5-cholenoic acid; SNAG- $\Delta^5$ -CT, Taurine-amidated

3 $\beta$ -sulfooxy-7 $\beta$ -*N*-acetylglucosaminyl-5-cholenoic acid; S7B- $\Delta^5$ -CA, 3 $\beta$ -Sulfooxy-7 $\beta$ -hydroxy-5-cholenoic acid; S7O- $\Delta^5$ -CA, 3 $\beta$ -Sulfooxy-7-oxo-5-cholenoic acid; IS, internal standard.
