# Supplementary material
Source: PubMed Central journal article supplement (PMC6889718)
Supplement: 10.1194_M093971_jlr.M093971-6.pdf [file 10.1194_M093971_jlr.M093971-6.pdf]

Supplementary Table 4 Demographics of healthy controls and NPC patients.

| Group                  | Healthy controls | Patients with NPC | <i>P</i> value |
|------------------------|------------------|-------------------|----------------|
| Number of values       | 38               | 28                |                |
| Male (%)               | 68.4             | 39.3              | 0.0179         |
| Mean (years)           | 18.0             | 13.4              | 0.1739         |
| Minimum (years)        | 0.25             | 0.0274            |                |
| 25% percentile (years) | 1.75             | 3.25              |                |
| Median age (years)     | 22               | 11.5              |                |
| 75% percentile (years) | 30               | 21                |                |
| Maximum (years)        | 47               | 48                |                |

NPC, Niemann–Pick disease type C.
