# Supplementary material
Source: PubMed Central journal article supplement (PMC6889718)
Supplement: 10.1194_M093971_jlr.M093971-7.pdf [file 10.1194_M093971_jlr.M093971-7.pdf]

Supplemental Table 5 The creatinine-corrected concentrations of SNAG- $\Delta^5$ -CA, SNAG- $\Delta^5$ -CG, SNAG- $\Delta^5$ -CT, S7B- $\Delta^5$ -CA and S7O- $\Delta^5$ -CA in the urine of all subjects.

| Sample | Age<br>(Years) | Sex    | SNAG- $\Delta^5$ -CA<br>(ng/mg Cr) | SNAG- $\Delta^5$ -CG<br>(ng/mg Cr) | SNAG- $\Delta^5$ -CT<br>(ng/mg Cr) | S7B- $\Delta^5$ -CA<br>(ng/mg Cr) | S7O- $\Delta^5$ -CA<br>(ng/mg Cr) | Total<br>(ng/mg Cr) |
|--------|----------------|--------|------------------------------------|------------------------------------|------------------------------------|-----------------------------------|-----------------------------------|---------------------|
| NPC1   | 0.25           | Male   | 29900                              | 37200                              | 42800                              | 44900                             | 48400                             | 203000              |
| NPC2   | 16             | Female | 184                                | 1150                               | 66.4                               | 695                               | 114                               | 2210                |
| NPC3   | 13             | Male   | 291                                | 237                                | 15.2                               | 182                               | 121                               | 846                 |
| NPC4   | 12             | Female | 900                                | 834                                | 110                                | 395                               | 269                               | 2510                |
| NPC5   | 5              | Female | 719                                | 593                                | 89.1                               | 554                               | 364                               | 2320                |
| NPC6   | 22             | Female | 186                                | 309                                | 49.3                               | 514                               | 130                               | 1190                |
| NPC7   | 15             | Male   | 293                                | 194                                | 75.4                               | 468                               | 119                               | 1150                |
| NPC8   | 14             | Female | 989                                | 316                                | 78.2                               | 574                               | 207                               | 2160                |
| NPC9   | 3              | Male   | 21100                              | 9390                               | 3940                               | 21000                             | 9630                              | 65100               |
| NPC10  | 8              | Male   | 0.561                              | 0.821                              | 0.182                              | 1170                              | 257                               | 1950                |
| NPC11  | 36             | Male   | 1160                               | 863                                | 28.3                               | 739                               | 173                               | 2960                |
| NPC12  | 24             | Female | 543                                | 1190                               | 60.5                               | 1070                              | 174                               | 3040                |
| NPC13  | 12             | Female | 31600                              | 81100                              | 3570                               | 52700                             | 8870                              | 178000              |
| NPC14  | 26             | Female | 430                                | 450                                | 62.8                               | 776                               | 128                               | 1850                |
| NPC15  | 18             | Female | 613                                | 1260                               | 85.7                               | 998                               | 155                               | 3110                |
| NPC16  | 11             | Female | 1280                               | 1670                               | 120                                | 1550                              | 394                               | 5010                |
| NPC17  | 30             | Female | N.Q.                               | 3.46                               | N.Q.                               | 748                               | 122                               | 875                 |
| NPC18  | 0.333          | Male   | 44200                              | 32600                              | 22800                              | 33200                             | 148000                            | 281000              |
| NPC19  | 0              | Male   | 13600                              | 547                                | 3960                               | 9820                              | 92300                             | 120000              |
| NPC20  | 11             | Female | 4030                               | 5050                               | 560                                | 4340                              | 680                               | 14700               |
| NPC21  | 4              | Female | 1820                               | 1160                               | 74.7                               | 2020                              | 796                               | 5870                |
| NPC22  | 0.67           | Male   | 235                                | 284                                | 19.0                               | 342                               | 89.1                              | 969                 |

|                   |      |        |        |        |       |       |       |        |
|-------------------|------|--------|--------|--------|-------|-------|-------|--------|
| NPC23             | 30   | Female | 80.4   | 100    | 15.3  | 142   | 35.8  | 374    |
| NPC24             | 0.6  | Male   | 131000 | 132000 | 14900 | 83400 | 19500 | 381000 |
| NPC25             | 6    | Female | 680    | 896    | 210   | 383   | 144   | 2310   |
| NPC26             | 48   | Male   | 655    | 730    | 52.4  | 394   | 83.3  | 1910   |
| NPC27             | 0.5  | Female | 9550   | 4290   | 8380  | 3790  | 6540  | 32600  |
| NPC28             | 9    | Female | 2330   | 1880   | 205   | 3360  | 627   | 8410   |
| Healthy control1  | 0.25 | Female | 97.4   | 55.4   | 92.7  | 80.9  | 173   | 499    |
| Healthy control2  | 0.33 | Male   | 68.5   | 57.5   | 52.8  | 125   | 50.1  | 354    |
| Healthy control3  | 0.33 | Female | 145    | 165    | 76.1  | 55.6  | 44.5  | 486    |
| Healthy control4  | 0.5  | Male   | 41.6   | 31.2   | 44.7  | 59.8  | 31.0  | 208    |
| Healthy control5  | 0.5  | Male   | 49.5   | 36.4   | 59.8  | 99.7  | 24.9  | 270    |
| Healthy control6  | 0.5  | Male   | 65.1   | 46.6   | 21.4  | 37.0  | 43.3  | 213    |
| Healthy control7  | 1    | Male   | 34.0   | 16.7   | 7.34  | 24.2  | 13.6  | 95.8   |
| Healthy control8  | 1    | Male   | 30.9   | 24.5   | 7.10  | 17.9  | 7.43  | 87.8   |
| Healthy control9  | 1    | Female | 5.63   | 13.7   | 4.25  | 93.0  | 14.6  | 131    |
| Healthy control10 | 2    | Male   | 12.8   | 13.5   | 4.36  | 17.3  | 5.85  | 53.8   |
| Healthy control11 | 2    | Female | 21.7   | 21.4   | 6.32  | 21.4  | 5.53  | 76.2   |
| Healthy control12 | 2    | Female | 10.8   | 18.9   | 22.9  | 24.8  | 6.75  | 84.1   |
| Healthy control13 | 2    | Male   | 16.4   | 19.0   | 8.02  | 19.1  | 6.27  | 68.8   |
| Healthy control14 | 2    | Male   | 23.0   | 14.8   | 6.37  | 16.6  | 5.43  | 66.1   |
| Healthy control15 | 2    | Male   | 12.7   | 16.6   | 4.36  | 21.1  | 9.46  | 64.2   |
| Healthy control16 | 35   | Female | 13.2   | 34.2   | 5.22  | 8.41  | 5.80  | 66.8   |
| Healthy control17 | 28   | Female | 20.0   | 16.0   | 1.45  | 13.6  | 5.92  | 57.0   |
| Healthy control18 | 25   | Female | 8.73   | 11.6   | 2.14  | 5.45  | 4.12  | 32.0   |
| Healthy control19 | 23   | Female | 10.3   | 13.8   | 1.44  | 5.65  | 2.92  | 34.1   |
| Healthy control20 | 24   | Male   | 15.5   | 17.3   | 1.13  | 11.6  | 4.65  | 50.1   |
| Healthy control21 | 30   | Male   | 10.8   | 16.5   | 1.37  | 7.41  | 4.34  | 40.4   |

|                   |    |        |      |      |       |       |      |       |
|-------------------|----|--------|------|------|-------|-------|------|-------|
| Healthy control22 | 30 | Male   | 12.7 | 18.1 | 2.52  | 9.84  | 4.21 | 47.4  |
| Healthy control23 | 36 | Male   | 4.85 | 7.70 | 1.75  | 5.58  | 2.53 | 22.4  |
| Healthy control24 | 21 | Male   | 3.33 | 10.2 | 0.906 | 7.23  | 1.97 | 23.7  |
| Healthy control25 | 22 | Male   | 8.10 | 11.9 | 1.98  | 7.80  | 4.34 | 34.1  |
| Healthy control26 | 23 | Male   | N.Q. | N.Q. | N.Q.  | 7.82  | 1.96 | 9.78  |
| Healthy control27 | 44 | Female | 11.3 | 20.2 | 2.26  | 7.38  | 4.17 | 45.3  |
| Healthy control28 | 29 | Male   | 6.47 | 15.4 | 3.36  | 7.58  | 3.38 | 36.2  |
| Healthy control29 | 47 | Male   | 25.4 | 29.5 | 1.93  | 15.6  | 3.81 | 76.2  |
| Healthy control30 | 31 | Male   | 5.91 | 9.46 | 0.748 | 8.93  | 1.50 | 26.5  |
| Healthy control31 | 36 | Male   | 14.2 | 18.3 | 3.25  | 16.4  | 8.16 | 60.3  |
| Healthy control32 | 36 | Male   | 20.4 | 51.5 | 4.80  | 12.1  | 2.71 | 91.5  |
| Healthy control33 | 34 | Male   | 8.35 | 9.85 | 3.05  | 5.97  | 3.17 | 30.4  |
| Healthy control34 | 22 | Male   | 4.53 | 6.98 | 2.32  | 19.3  | 5.19 | 38.3  |
| Healthy control35 | 23 | Female | 16.3 | 25.9 | 3.07  | 8.95  | 4.49 | 58.7  |
| Healthy control36 | 21 | Male   | 6.79 | 13.6 | 1.54  | 11.7  | 3.50 | 37.1  |
| Healthy control37 | 21 | Female | 5.64 | 6.06 | 0.305 | 7.44  | 3.04 | 22.5  |
| Healthy control38 | 26 | Male   | 7.68 | 15.4 | 1.98  | 5.41  | 2.47 | 33.0  |
| CTX01             | 42 | Female | 2.0  | 6.5  | 0.9   | 3.1   | 1.3  | 13.9  |
| CTX02             | 56 | Female | 11.7 | 7.9  | 4.8   | 16.7  | 3.5  | 44.5  |
| CTX03             | 50 | Female | 12.5 | 8.5  | 4.5   | 7.5   | 4.0  | 36.9  |
| GAU01             | 18 | Female | 82.9 | 55.4 | 4.4   | 25.2  | 0.9  | 168.7 |
| GAU02             | 20 | Female | 0.1  | 0.5  | 0.5   | 23.7  | 8.2  | 33.1  |
| GAU03             | 15 | Female | 58.4 | 21.7 | 7.8   | 39.3  | 11.2 | 138.4 |
| HUN01             | 18 | Male   | 5.3  | 11.6 | 3.9   | 19.6  | 3.7  | 44.1  |
| HUN02             | 8  | Male   | 44.6 | 35.9 | 5.2   | 18.3  | 11.2 | 115.3 |
| SLOS01            | 22 | Male   | 67.0 | 85.9 | 33.4  | 328.0 | 77.0 | 591.3 |

N.Q., Quantitation was not carried out because it was below the lower limit of determination; Cr, creatinine; NPC, Niemann–Pick disease type C; SNAG- $\Delta^5$ -CA, 3 $\beta$ -Sulfoxy-7 $\beta$ -*N*-acetylglucosaminy-5-cholenoic acid; SNAG- $\Delta^5$ -CG, Glycine-amidated 3 $\beta$ -sulfoxy-7 $\beta$ -*N*-acetylglucosaminy-5-cholenoic acid; SNAG- $\Delta^5$ -CT, Taurine-amidated 3 $\beta$ -sulfoxy-7 $\beta$ -*N*-acetylglucosaminy-5-cholenoic acid; S7B- $\Delta^5$ -CA, 3 $\beta$ -Sulfoxy-7 $\beta$ -hydroxy-5-cholenoic acid; S7O- $\Delta^5$ -CA, 3 $\beta$ -Sulfoxy-7-oxo-5-cholenoic acid; **CTX, Cerebrotendinous Xanthomatosis; GAU, gaucher disease; HUN, hunter disease; SLOS, Smith-Lemli-Opitz syndrome.**
