# Supplementary material
Source: PubMed Central journal article supplement (PMC6889718)
Supplement: 10.1194_M093971_jlr.M093971-8.pdf [file 10.1194_M093971_jlr.M093971-8.pdf]

Supplemental Table 6 The uncorrected concentrations of SNAG- $\Delta^5$ -CA, SNAG- $\Delta^5$ -CG, SNAG- $\Delta^5$ -CT, S7B- $\Delta^5$ -CA and S7O- $\Delta^5$ -CA in the urine of all subjects.

| Sample | Age<br>(Years) | Sex    | SNAG- $\Delta^5$ -CA<br>(ng/mL) | SNAG- $\Delta^5$ -CG<br>(ng/mL) | SNAG- $\Delta^5$ -CT<br>(ng/mL) | S7B- $\Delta^5$ -CA<br>(ng/mL) | S7O- $\Delta^5$ -CA<br>(ng/mL) | Total<br>(ng/mL) |
|--------|----------------|--------|---------------------------------|---------------------------------|---------------------------------|--------------------------------|--------------------------------|------------------|
| NPC1   | 0.25           | Male   | 11210                           | 13900                           | 16000                           | 16800                          | 18100                          | 76200            |
| NPC2   | 16             | Female | 611                             | 3810                            | 220                             | 2300                           | 378                            | 7320             |
| NPC3   | 13             | Male   | 562                             | 459                             | 29.5                            | 352                            | 234                            | 1640             |
| NPC4   | 12             | Female | 1860                            | 1730                            | 228                             | 818                            | 557                            | 5190             |
| NPC5   | 5              | Female | 546                             | 451                             | 67.7                            | 421                            | 277                            | 1760             |
| NPC6   | 22             | Female | 253                             | 419                             | 67.0                            | 699                            | 176                            | 1610             |
| NPC7   | 15             | Male   | 423                             | 280                             | 109                             | 676                            | 172                            | 1660             |
| NPC8   | 14             | Female | 1120                            | 357                             | 88.5                            | 649                            | 234                            | 2450             |
| NPC9   | 3              | Male   | 4040                            | 1800                            | 755                             | 4030                           | 1850                           | 12500            |
| NPC10  | 8              | Male   | 1.08                            | 1.58                            | 0.350                           | 3260                           | 493                            | 3750             |
| NPC11  | 36             | Male   | 348                             | 260                             | 8.53                            | 223                            | 52.1                           | 891              |
| NPC12  | 24             | Female | 318                             | 698                             | 35.4                            | 625                            | 102                            | 1780             |
| NPC13  | 12             | Female | 529                             | 1360                            | 59.7                            | 884                            | 149                            | 2980             |
| NPC14  | 26             | Female | 934                             | 979                             | 137                             | 1690                           | 279                            | 4020             |
| NPC15  | 18             | Female | 890                             | 1820                            | 124                             | 1448                           | 225                            | 4510             |
| NPC16  | 11             | Female | 599                             | 783                             | 56.1                            | 725                            | 185                            | 2350             |
| NPC17  | 30             | Female | N.Q.                            | 0.780                           | N.Q.                            | 169                            | 27.5                           | 197              |
| NPC18  | 0.333          | Male   | 5340                            | 3940                            | 2760                            | 4010                           | 17900                          | 33900            |
| NPC19  | 0              | Male   | 3940                            | 158                             | 1140                            | 2840                           | 26700                          | 34700            |
| NPC20  | 11             | Female | 1090                            | 1370                            | 152                             | 1180                           | 185                            | 3980             |
| NPC21  | 4              | Female | 1350                            | 864                             | 55.7                            | 1510                           | 594                            | 4380             |
| NPC22  | 0.67           | Male   | 235                             | 283                             | 19.0                            | 342                            | 88.9                           | 968              |

|                   |      |        |      |      |       |      |       |       |
|-------------------|------|--------|------|------|-------|------|-------|-------|
| NPC23             | 30   | Female | 223  | 278  | 42.4  | 395  | 99.5  | 1040  |
| NPC24             | 0.6  | Male   | 1870 | 1880 | 212   | 1190 | 279   | 5430  |
| NPC25             | 6    | Female | 465  | 613  | 144   | 262  | 98.2  | 1580  |
| NPC26             | 48   | Male   | 544  | 607  | 43.6  | 328  | 69.3  | 1590  |
| NPC27             | 0.5  | Female | 239  | 107  | 209   | 94.8 | 164   | 814   |
| NPC28             | 9    | Female | 2820 | 2270 | 247   | 4060 | 758   | 10200 |
| Healthy control1  | 0.25 | Female | 5.61 | 3.19 | 5.34  | 4.66 | 9.94  | 28.7  |
| Healthy control2  | 0.33 | Male   | 46.6 | 39.1 | 35.9  | 84.8 | 34.1  | 240   |
| Healthy control3  | 0.33 | Female | 4.73 | 5.36 | 2.48  | 1.81 | 1.45  | 15.8  |
| Healthy control4  | 0.5  | Male   | 4.12 | 3.09 | 4.43  | 5.93 | 3.07  | 20.6  |
| Healthy control5  | 0.5  | Male   | 13.3 | 9.80 | 16.1  | 26.8 | 6.69  | 72.8  |
| Healthy control6  | 0.5  | Male   | 5.63 | 4.03 | 1.85  | 3.20 | 3.75  | 18.5  |
| Healthy control7  | 1    | Male   | 6.80 | 3.35 | 1.47  | 4.84 | 2.72  | 19.2  |
| Healthy control8  | 1    | Male   | 6.53 | 5.17 | 1.50  | 3.78 | 1.57  | 18.6  |
| Healthy control9  | 1    | Female | 2.82 | 6.85 | 2.13  | 46.6 | 7.34  | 65.8  |
| Healthy control10 | 2    | Male   | 3.77 | 3.99 | 1.29  | 5.12 | 1.73  | 15.9  |
| Healthy control11 | 2    | Female | 6.00 | 5.91 | 1.75  | 5.91 | 1.53  | 21.1  |
| Healthy control12 | 2    | Female | 9.02 | 15.8 | 19.1  | 20.7 | 5.65  | 70.3  |
| Healthy control13 | 2    | Male   | 4.31 | 4.99 | 2.11  | 5.03 | 1.65  | 18.1  |
| Healthy control14 | 2    | Male   | 14.4 | 9.25 | 3.99  | 10.4 | 3.40  | 41.4  |
| Healthy control15 | 2    | Male   | 5.95 | 7.82 | 2.05  | 9.92 | 4.45  | 30.2  |
| Healthy control16 | 35   | Female | 1.57 | 4.06 | 0.620 | 1.00 | 0.690 | 7.94  |
| Healthy control17 | 28   | Female | 17.1 | 13.7 | 1.24  | 11.6 | 5.07  | 48.8  |
| Healthy control18 | 25   | Female | 12.6 | 16.7 | 3.09  | 7.86 | 5.93  | 46.2  |
| Healthy control19 | 23   | Female | 6.34 | 8.49 | 0.890 | 3.48 | 1.80  | 21.0  |
| Healthy control20 | 24   | Male   | 41.1 | 45.8 | 3.01  | 30.9 | 12.4  | 133   |
| Healthy control21 | 30   | Male   | 10.1 | 15.4 | 1.28  | 6.94 | 4.06  | 37.8  |

|                   |    |        |        |       |       |      |      |      |
|-------------------|----|--------|--------|-------|-------|------|------|------|
| Healthy control22 | 30 | Male   | 18.3   | 26.2  | 3.63  | 14.2 | 6.07 | 68.3 |
| Healthy control23 | 36 | Male   | 11.3   | 17.9  | 4.05  | 13.0 | 5.87 | 52.0 |
| Healthy control24 | 21 | Male   | 2.13   | 6.56  | 0.580 | 4.63 | 1.26 | 15.2 |
| Healthy control25 | 22 | Male   | 13.0   | 19.2  | 3.18  | 12.6 | 6.99 | 55.0 |
| Healthy control26 | 23 | Male   | N.Q.   | N.Q.  | N.Q.  | 20.2 | 5.05 | 25.8 |
| Healthy control27 | 44 | Female | 28.4   | 50.7  | 5.67  | 18.5 | 10.5 | 114  |
| Healthy control28 | 29 | Male   | 11.8   | 28.0  | 6.10  | 13.8 | 6.14 | 65.8 |
| Healthy control29 | 47 | Male   | 76.8   | 89.2  | 5.84  | 47.1 | 11.5 | 230  |
| Healthy control30 | 31 | Male   | 12.8   | 20.5  | 1.62  | 19.3 | 3.25 | 57.5 |
| Healthy control31 | 36 | Male   | 18.1   | 23.3  | 4.13  | 20.8 | 10.4 | 76.6 |
| Healthy control32 | 36 | Male   | 63.9   | 162   | 15.1  | 38.0 | 8.50 | 287  |
| Healthy control33 | 34 | Male   | 24.1   | 28.4  | 8.77  | 17.2 | 9.14 | 87.5 |
| Healthy control34 | 22 | Male   | 11.2   | 17.3  | 5.75  | 47.8 | 12.8 | 94.9 |
| Healthy control35 | 23 | Female | 64.5   | 103   | 12.1  | 35.4 | 17.7 | 232  |
| Healthy control36 | 21 | Male   | 22.8   | 45.8  | 5.16  | 39.4 | 11.8 | 125  |
| Healthy control37 | 21 | Female | 11.5   | 12.3  | 0.620 | 15.1 | 6.19 | 45.7 |
| Healthy control38 | 26 | Male   | 14.030 | 28.2  | 3.62  | 9.88 | 4.52 | 60.3 |
| CTX01             | 42 | Female | 3.00   | 9.60  | 1.40  | 4.60 | 1.90 | 20.5 |
| CTX02             | 56 | Female | 7.85   | 5.35  | 3.2   | 11.2 | 2.34 | 30.0 |
| CTX03             | 50 | Female | 11.5   | 7.82  | 4.1   | 6.91 | 3.64 | 34.0 |
| GAU01             | 18 | Female | 87.54  | 58.5  | 4.6   | 26.6 | 0.92 | 178  |
| GAU02             | 20 | Female | N.Q.   | 0.350 | 0.410 | 17.7 | 6.15 | 24.7 |
| GAU03             | 15 | Female | 73.0   | 27.2  | 9.75  | 49.2 | 14.0 | 173  |
| HUN01             | 18 | Male   | 2.78   | 6.07  | 2.02  | 10.3 | 1.92 | 23.0 |
| HUN02             | 8  | Male   | 11.7   | 9.38  | 1.37  | 4.77 | 2.92 | 30.1 |
| SLOS01            | 22 | Male   | 25.7   | 33.0  | 12.8  | 126  | 29.5 | 227  |

---

N.Q., Quantitation was not carried out because it was below the lower limit of determination; NPC, Niemann–Pick disease type C; SNAG- $\Delta^5$ -CA, 3 $\beta$ -Sulfooxy-7 $\beta$ -*N*-acetylglucosaminyl-5-cholenoic acid; SNAG- $\Delta^5$ -CG, Glycine-amidated 3 $\beta$ -sulfooxy-7 $\beta$ -*N*-acetylglucosaminyl-5-cholenoic acid; SNAG- $\Delta^5$ -CT, Taurine-amidated 3 $\beta$ -sulfooxy-7 $\beta$ -*N*-acetylglucosaminyl-5-cholenoic acid; S7B- $\Delta^5$ -CA, 3 $\beta$ -Sulfooxy-7 $\beta$ -hydroxy-5-cholenoic acid; S7O- $\Delta^5$ -CA, 3 $\beta$ -Sulfooxy-7-oxo-5-cholenoic acid.
