# Supplementary material
Source: PubMed Central journal article supplement (PMC6889718)
Supplement: 10.1194_M093971_jlr.M093971-9.pdf [file 10.1194_M093971_jlr.M093971-9.pdf]

Supplementary Table 7 The creatinine-corrected concentration of SNAG- $\Delta^5$ -CA, SNAG- $\Delta^5$ -CG, SNAG- $\Delta^5$ -CT, S7B- $\Delta^5$ -CA, S7O- $\Delta^5$ -CA and the total concentration in urine of healthy controls and NPC patients.

| Healthy controls  |                                    |                                    |                                    |                                   |                                   |                                     |
|-------------------|------------------------------------|------------------------------------|------------------------------------|-----------------------------------|-----------------------------------|-------------------------------------|
|                   | SNAG- $\Delta^5$ -CA<br>(ng/mg Cr) | SNAG- $\Delta^5$ -CG<br>(ng/mg Cr) | SNAG- $\Delta^5$ -CT<br>(ng/mg Cr) | S7B- $\Delta^5$ -CA<br>(ng/mg Cr) | S7O- $\Delta^5$ -CA<br>(ng/mg Cr) | Total<br>(ng/mg Cr)                 |
| Mean              | 23.7                               | 25.1                               | 12.6                               | 24.5                              | 13.9                              | 98.2                                |
| SD                | 28.9                               | 27.0                               | 22.5                               | 29.3                              | 29.1                              | 118                                 |
| Minimum           | 3.33                               | 6.06                               | 0.305                              | 5.41                              | 1.50                              | 9.78                                |
| Median            | 12.8                               | 16.7                               | 3.25                               | 12.8                              | 4.92                              | 57.9                                |
| Maximum           | 145                                | 165                                | 92.7                               | 125                               | 172                               | 499                                 |
| Patients with NPC |                                    |                                    |                                    |                                   |                                   |                                     |
|                   | SNAG- $\Delta^5$ -CA<br>(ng/mg Cr) | SNAG- $\Delta^5$ -CG<br>(ng/mg Cr) | SNAG- $\Delta^5$ -CT<br>(ng/mg Cr) | S7B- $\Delta^5$ -CA<br>(ng/mg Cr) | S7O- $\Delta^5$ -CA<br>(ng/mg Cr) | SNAG- $\Delta^5$ -CAs<br>(ng/mg Cr) |
| Mean              | 11100                              | 11300                              | 7270                               | 9670                              | 12100                             | 47400                               |
| SD                | 26700                              | 29200                              | 3710                               | 20000                             | 32900                             | 97000                               |
| Minimum           | 0.561                              | 0.821                              | 0.182                              | 142                               | 35.8                              | 373                                 |
| Median            | 897                                | 879                                | 85.7                               | 887                               | 231                               | 2730                                |
| Maximum           | 131000                             | 132000                             | 42800                              | 83400                             | 148000                            | 381000                              |

Cr, Creatinine; NPC, Niemann–Pick disease type C; SNAG- $\Delta^5$ -CA, 3 $\beta$ -Sulfooxy-7 $\beta$ -*N*-acetylglucosaminyl-5-cholenoic acid; SNAG- $\Delta^5$ -CG, Glycine-amidated 3 $\beta$ -sulfooxy-7 $\beta$ -*N*-acetylglucosaminyl-5-cholenoic acid; SNAG- $\Delta^5$ -CT, Taurine-amidated 3 $\beta$ -sulfooxy-7 $\beta$ -*N*-acetylglucosaminyl-5-cholenoic acid; S7B- $\Delta^5$ -CA, 3 $\beta$ -Sulfooxy-7 $\beta$ -hydroxy-5-cholenoic acid; S7O- $\Delta^5$ -CA, 3 $\beta$ -Sulfooxy-7-oxo-5-cholenoic acid.
